# Supplementary material for: Synthesis, DNA-binding and antiproliferative properties of diarylquinolizinium derivatives
Source: Royal Society of Chemistry journal article supplement (doi:10.1039/d0ob02298e), 2020-12-23
Supplement: d0ob02298e1.pdf [file d0ob02298e1.pdf]

## Electronic Supporting Information (ESI)

### Synthesis, DNA-binding and antiproliferative properties of diarylquinolizinium derivatives

Roberta Bortolozzi,<sup>a</sup> Heiko Ihmels,<sup>\*b</sup> Robin Schulte,<sup>b</sup> Christopher Stremmel,<sup>b</sup> Giampietro Viola<sup>\*a</sup>

#### Table of contents

|                                                           |    |
|-----------------------------------------------------------|----|
| <b>1. Absorption and emission properties</b> .....        | S2 |
| <b>2. DNA-binding properties</b> .....                    | S3 |
| 2.1. Spectrometric titrations.....                        | S3 |
| 2.2. CD- and LD-spectroscopic analysis.....               | S6 |
| 2.3. <sup>1</sup> H- and <sup>13</sup> C-NMR spectra..... | S9 |

## 1. Absorption and emission properties

**Table S1.** Absorption and emission properties of diarylquinolinium derivatives **3a–j**.

| <b>3a</b>         |                                   |                           |                                  |                                    | <b>3b</b>                         |                           |                                  |                                    |
|-------------------|-----------------------------------|---------------------------|----------------------------------|------------------------------------|-----------------------------------|---------------------------|----------------------------------|------------------------------------|
| Solvent           | $\lambda_{\text{abs}}^{\text{a}}$ | $\lg \epsilon^{\text{b}}$ | $\lambda_{\text{fl}}^{\text{c}}$ | $\Phi_{\text{fl}} / \%^{\text{d}}$ | $\lambda_{\text{abs}}^{\text{a}}$ | $\lg \epsilon^{\text{b}}$ | $\lambda_{\text{fl}}^{\text{c}}$ | $\Phi_{\text{fl}} / \%^{\text{d}}$ |
| MeOH              | 357                               | 4.45                      | 383                              | 62                                 | 365                               | 4.52                      | 398                              | 64                                 |
| MeCN              | 358                               | 4.45                      | 382                              | 58                                 | 364                               | 4.45                      | 399                              | 60                                 |
| CHCl <sub>3</sub> | 366                               | 4.44                      | 388                              | 6                                  | 374                               | 4.53                      | 403                              | 3                                  |
| <b>3c</b>         |                                   |                           |                                  |                                    | <b>3d</b>                         |                           |                                  |                                    |
| Solvent           | $\lambda_{\text{abs}}^{\text{a}}$ | $\lg \epsilon^{\text{b}}$ | $\lambda_{\text{fl}}^{\text{c}}$ | $\Phi_{\text{fl}} / \%^{\text{f}}$ | $\lambda_{\text{abs}}^{\text{a}}$ | $\lg \epsilon^{\text{b}}$ | $\lambda_{\text{fl}}^{\text{c}}$ | $\Phi_{\text{fl}} / \%^{\text{e}}$ |
| MeOH              | 360                               | 4.34                      | 471                              | 76                                 | 382                               | 4.65                      | 441                              | 93                                 |
| MeCN              | 359                               | 4.29                      | 474                              | 70                                 | 381                               | 4.56                      | 447                              | 87                                 |
| CHCl <sub>3</sub> | 377                               | 4.02                      | 457                              | 5                                  | 396                               | 4.61                      | 436                              | 21                                 |
| <b>3e</b>         |                                   |                           |                                  |                                    | <b>3f</b>                         |                           |                                  |                                    |
| Solvent           | $\lambda_{\text{abs}}^{\text{a}}$ | $\lg \epsilon^{\text{b}}$ | $\lambda_{\text{fl}}^{\text{c}}$ | $\Phi_{\text{fl}} / \%^{\text{f}}$ | $\lambda_{\text{abs}}^{\text{a}}$ | $\lg \epsilon^{\text{b}}$ | $\lambda_{\text{fl}}^{\text{c}}$ | $\Phi_{\text{fl}} / \%^{\text{f}}$ |
| MeOH              | 394                               | 4.72                      | 527                              | 31                                 | 381                               | 4.51                      | 515                              | 2                                  |
| MeCN              | 391                               | 4.68                      | 511                              | 40                                 | 380                               | 4.59                      | 520                              | 4                                  |
| CHCl <sub>3</sub> | 408                               | 4.69                      | 482                              | 18                                 | 392                               | 4.54                      | 535                              | 8                                  |
| <b>3g</b>         |                                   |                           |                                  |                                    | <b>3h</b>                         |                           |                                  |                                    |
| Solvent           | $\lambda_{\text{abs}}^{\text{a}}$ | $\lg \epsilon^{\text{b}}$ | $\lambda_{\text{fl}}^{\text{c}}$ | $\Phi_{\text{fl}} / \%^{\text{d}}$ | $\lambda_{\text{abs}}^{\text{a}}$ | $\lg \epsilon^{\text{b}}$ | $\lambda_{\text{fl}}^{\text{c}}$ | $\Phi_{\text{fl}} / \%^{\text{d}}$ |
| MeOH              | 359                               | 4.41                      | 384                              | 61                                 | 361                               | 4.45                      | 398                              | <1.0                               |
| MeCN              | 358                               | 4.50                      | 381                              | 61                                 | 360                               | 4.51                      | 398                              | <1.0                               |
| CHCl <sub>3</sub> | –                                 | –                         | –                                | –                                  | –                                 | –                         | –                                | –                                  |
| <b>3i</b>         |                                   |                           |                                  |                                    | <b>3j</b>                         |                           |                                  |                                    |
| Solvent           | $\lambda_{\text{abs}}^{\text{a}}$ | $\lg \epsilon^{\text{b}}$ | $\lambda_{\text{fl}}^{\text{c}}$ | $\Phi_{\text{fl}} / \%^{\text{d}}$ | $\lambda_{\text{abs}}^{\text{a}}$ | $\lg \epsilon^{\text{b}}$ | $\lambda_{\text{fl}}^{\text{c}}$ | $\Phi_{\text{fl}} / \%^{\text{e}}$ |
| MeOH              | 359                               | 4.41                      | 384                              | 61                                 | 387                               | 4.69                      | 437                              | 92                                 |
| MeCN              | 358                               | 4.50                      | 381                              | 61                                 | 390                               | 4.65                      | 450                              | 76                                 |
| CHCl <sub>3</sub> | –                                 | –                         | –                                | –                                  | 390                               | 4.71                      | 432                              | 19                                 |

<sup>a</sup> Long-wavelength absorption maxima in nm,  $c = 20 \mu\text{M}$ . <sup>b</sup> Molar extinction coefficient in  $\text{cm}^{-1} \text{M}^{-1}$ . <sup>c</sup> Fluorescence emission maximum with Abs. = 0.1 at excitation wavelength; **3a**, **3b**, **3g**, and **3h**:  $\lambda_{\text{ex}} = 330 \text{ nm}$ ; **3c–f**, and **3j**:  $\lambda_{\text{ex}} = 380 \text{ nm}$ . <sup>d</sup> Fluorescence quantum yield relative to coumarin 120 (ref. 1). <sup>e</sup> Fluorescence quantum yield relative to coumarin 1 (Ref. 2). <sup>f</sup> Fluorescence quantum yield relative to coumarin 102 (Ref. 2).

<sup>1</sup> H. Pal, S. Nad, and M. Kumbhakar, *J. Chem. Phys.* 2003, **119**, 443.

<sup>2</sup> G. Jones, W. R. Jackson, C. Y. Choi, and W. R. Bergmark, *J. Phys. Chem.* 1985, **89**, 294.

## 2. DNA-binding properties

### 2.1. Spectrometric titrations

All DNA titrations were performed in BPE buffer (pH = 7.0; with 5% DMSO). The titrant solution contained the same ligand concentration as the analyte solution, to ensure a constant ligand concentration throughout the titration. The excitation wavelength in the fluorimetric titrations was  $\lambda_{\text{ex}} = 330$  nm for the ligands **3a**, **3b**, **3g**, and **3h** and  $\lambda_{\text{ex}} = 380$  nm for the ligands **3c–f**, and **3j**. After recording the pure ligand solution, small aliquots of DNA solution were titrated to the ligand solution until no significant change in absorbance or fluorescence intensity was observed. The spectra were recorded after an equilibration time of 3 min.

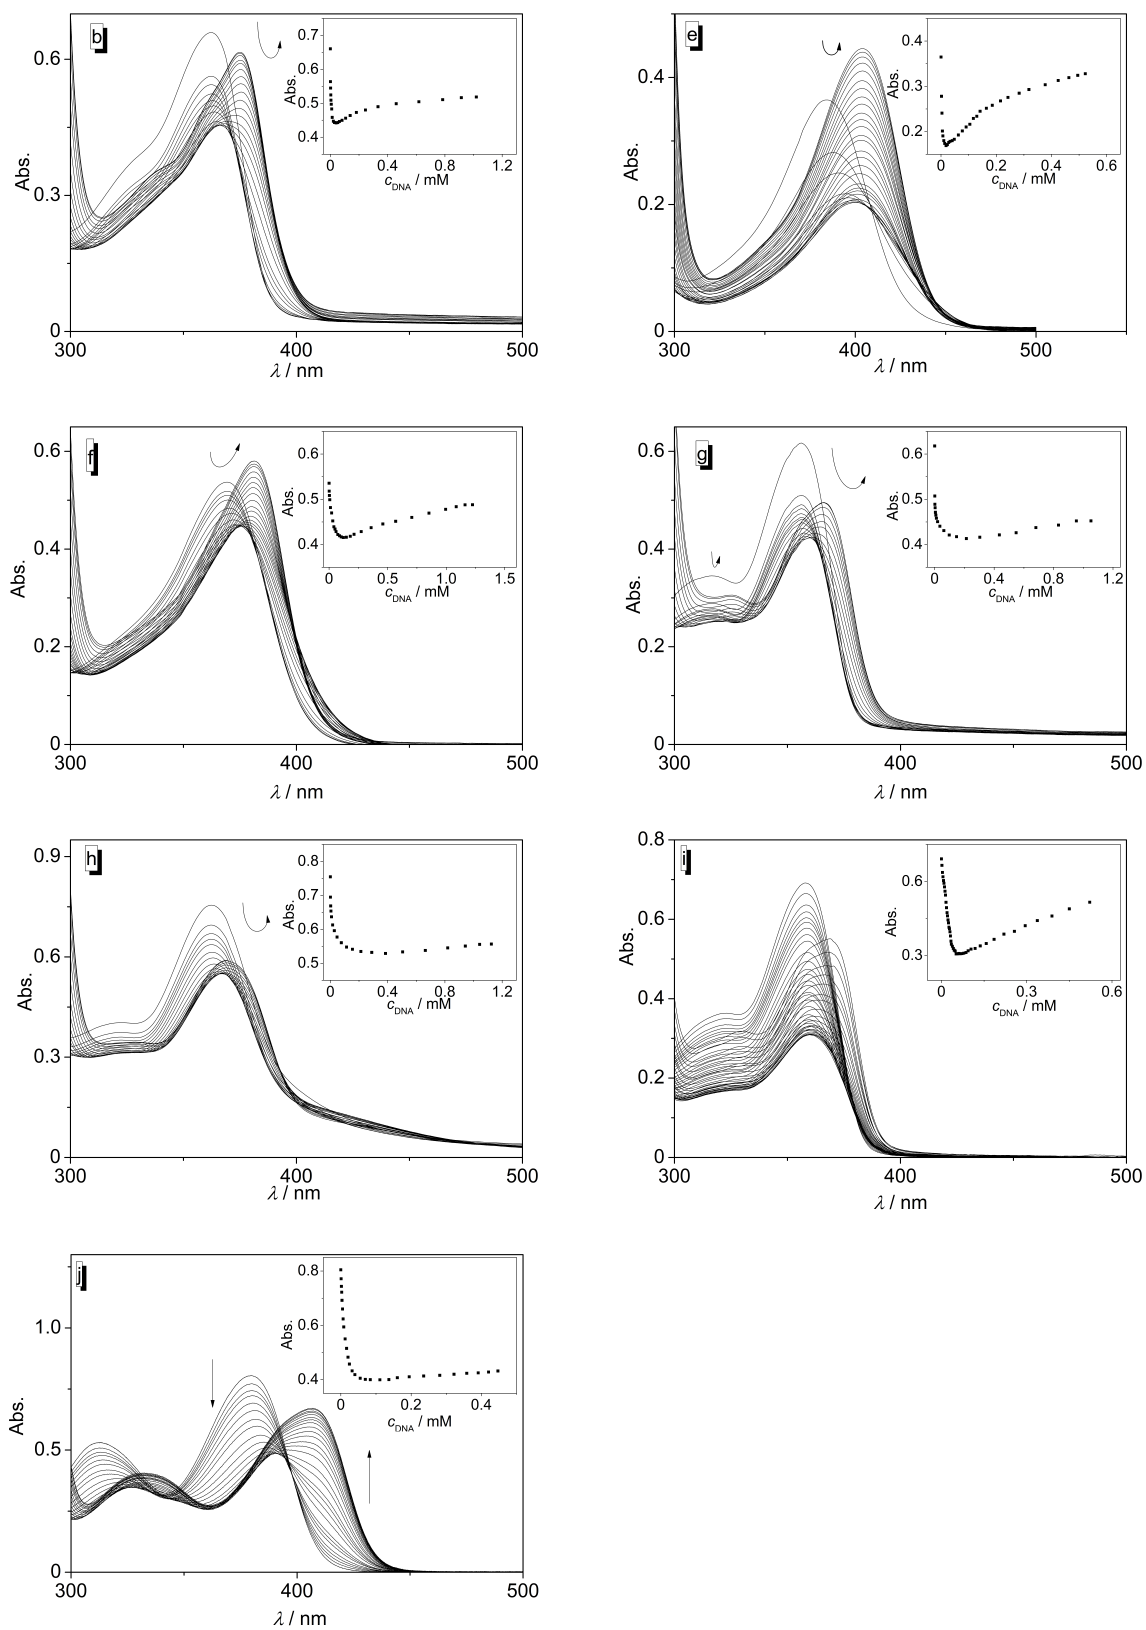

**Figure S1.** Photometric titration of **3b** (b), **3e** (e), **3f** (f), **3g** (g), **3h** (h), **3i** (i), and **3j** (j) ( $c = 20 \mu\text{M}$ ) with ct DNA ( $c = 2.0 \text{ mM}$  in base pairs) in BPE buffer ( $\text{pH} = 7.0$ ; 5% v/v DMSO). The arrows indicate the development of the absorption bands during titration. Inset: Plot of absorbance Abs. versus  $c_{\text{DNA}}$ .

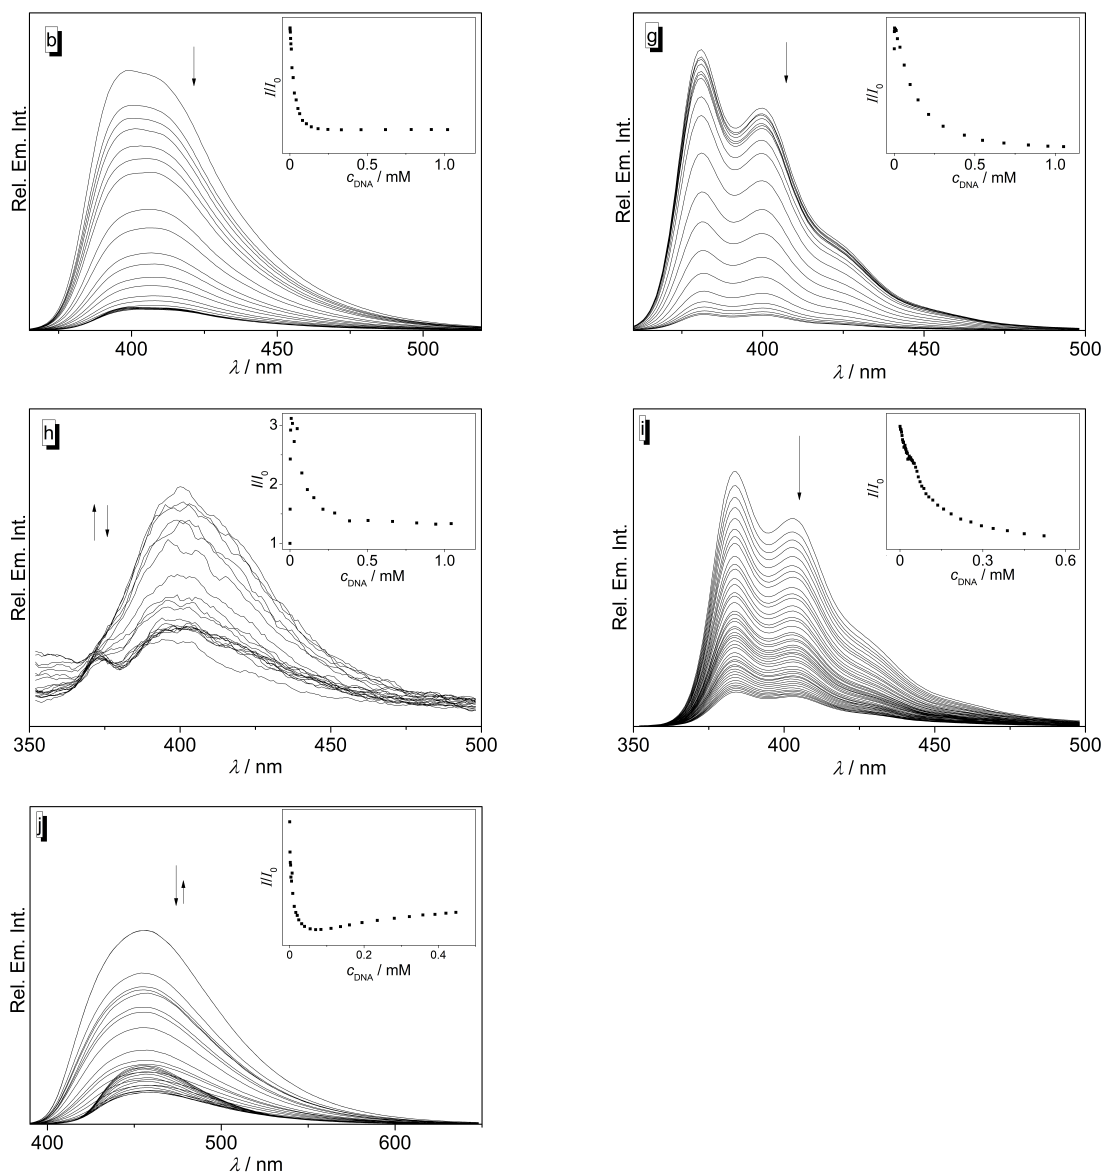

**Figure S2.** Fluorimetric titration of **3b** (b), **3g** (g), **3h** (h), **3i** (i) and **3j** (j) ( $c = 20 \mu\text{M}$ ) with ct DNA ( $c = 2.0 \text{ mM}$  in base pairs) in BPE buffer ( $\text{pH} = 7.0$ ; 5% v/v DMSO). The arrows indicate the development of the emission bands during titration. Inset: Plot of normalized emission intensity  $I / I_0$  versus  $c_{\text{DNA}}$ .

The data from the fluorimetric (**3a**, **3c**, **3e**, **3f**, **3g**, and **3i**) or photometric (**3b**, **3d**, and **3j**) were used to calculate the binding constants by fitting the data to the theoretical model.<sup>3,4</sup> Therefore the datapoints were displayed as Scatchard plots and numerically fitted to the neighbor exclusion model of McGhee and von Hippel (eq. 1, Figure S3). The fitting was calculated with the implemented Levenberg-Marquardt non-linear curve fitting algorithm of Origin 8.5.1.

<sup>3</sup> J. D. McGhee, P. H. von Hippel, *J. Mol. Biol.* 1974, **86**, 469–489.

<sup>4</sup> A. Granzhan, H. Ihmels and G. Viola, *J. Am. Chem. Soc.* 2007, **129**, 1254–1267.

$$\frac{r}{c} = K(1 - nr) \left( \frac{1 - nr}{1 - (n-1)r} \right)^{n-1} \quad (\text{eq. 1})$$

$$r = \text{ratio of bound ligand molecules per DNA base pair: } r = \frac{c_b}{c_{\text{DNA}}} \quad (\text{eq. 2})$$

$$c = \text{concentration of the unbound ligand: } c = c_L - c_b \quad (\text{eq. 3})$$

$$c_b: \text{concentration of the DNA-bound ligand: } c_b = c_L \times \frac{A_f - A}{A_f - A_b} \quad (\text{eq. 4})$$

$A_f$  is the absorbance/emission of the free ligand at a given wavelength,  $A_b$  is the absorbance/emission of the bound ligand, and  $A$  is the absorbance/emission at a given ligand-to-DNA ratio.

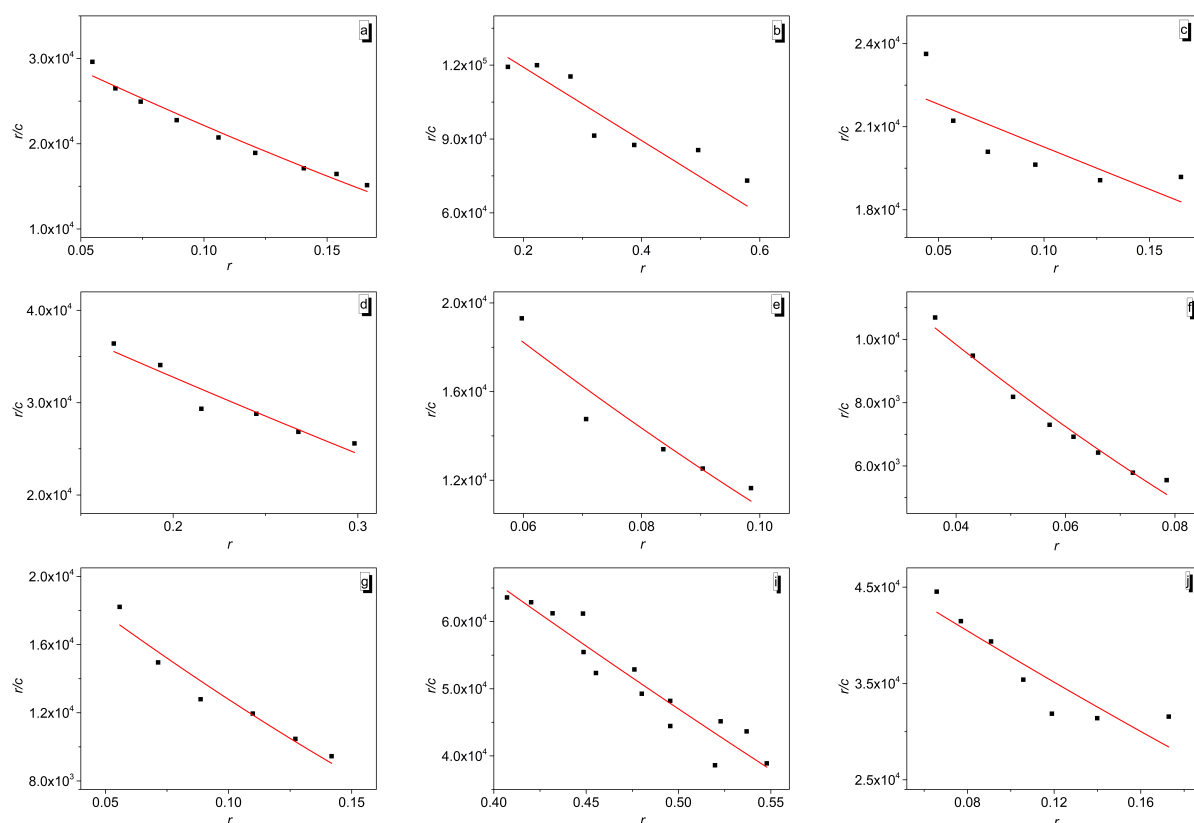

**Figure S3.** Scatchard plot of  $r/c$  versus  $r$  from spectrofluorimetric titration of ct DNA to **3a** (a), **3c** (c), **3e** (e), **3f** (f), **3g** (g), and **3i** (i) and from spectrophotometric titration of ct DNA to **3b** (b) and **3d** (d), and **3j** (j) and fit of the experimental data to the theoretical model.

## 2.2. CD- and LD-spectroscopic analysis

The following setup was used to record the CD and LD spectra:

|                    |            |
|--------------------|------------|
| Wavelength range   | 230–500 nm |
| Bandwidth          | 1.0 nm     |
| Scan rate          | 1.0 nm/s   |
| Time per datapoint | 0.5 s      |
| Temperature        | 20 °C      |

The solutions were prepared according to Table S2 and S3 and measured after an equilibration time of 30 min.

**Table S2.** Composition of samples for CD-spectroscopic measurements.

| Sample <sup>a</sup> | $c_{\text{Ligand}}/\mu\text{M}$ | $V_{\text{Ligand}}/\mu\text{L}^b$ | $LDR$ |
|---------------------|---------------------------------|-----------------------------------|-------|
| 1                   | 0                               | 0                                 | 0     |
| 2                   | 1.0                             | 2.0                               | 0.05  |
| 3                   | 4.0                             | 8.0                               | 0.20  |
| 4                   | 10                              | 20                                | 0.50  |
| 5                   | 20                              | 40                                | 1.00  |

<sup>a</sup> $c_{\text{DNA}} = 20 \mu\text{M}$ ;  $V_{\text{DNA}} = 200 \mu\text{L}$ ;  $V(\text{buffer}) = 1700 \mu\text{L}$   $V(\text{DMSO}) = 100 \mu\text{L}$ ; <sup>b</sup> $c_0(\text{Ligand}) = 1.00 \text{ mM}$  in MeOH, Solvent was removed prior to the addition of DMSO, DNA and buffer.

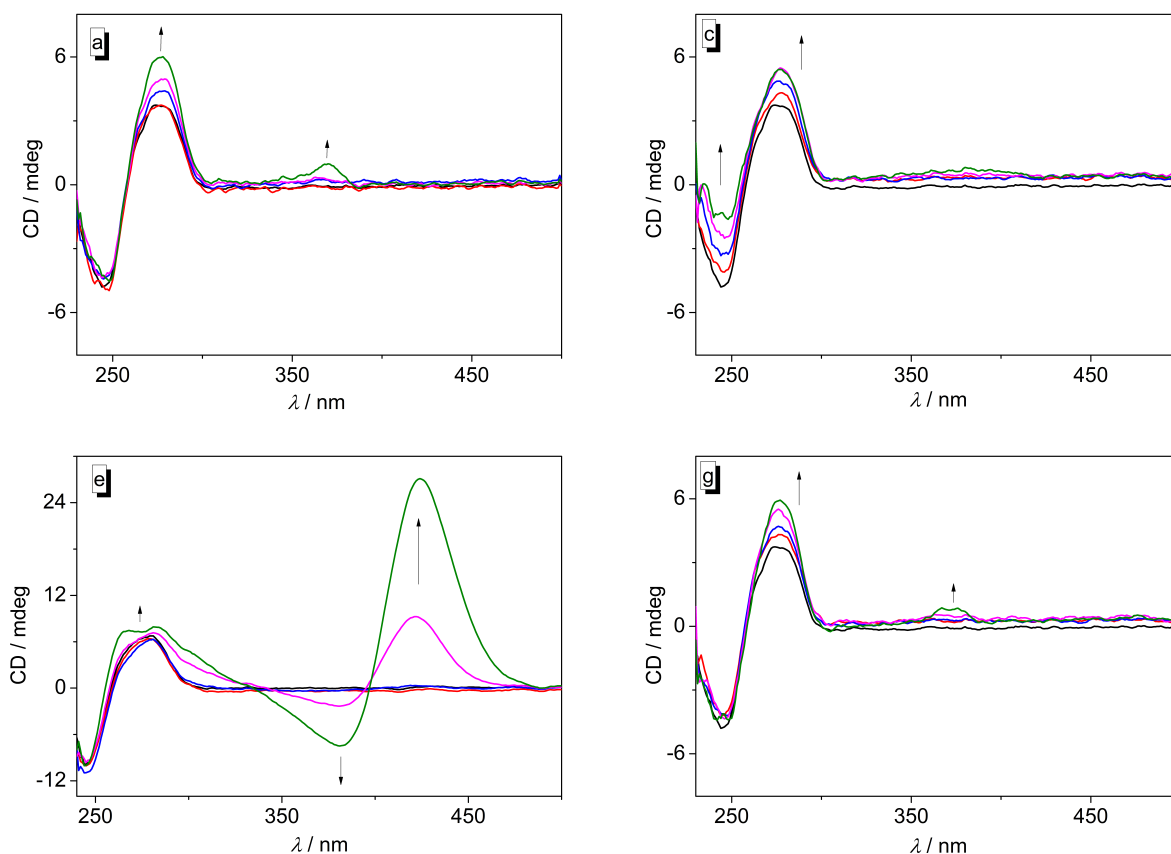

**Figure S4.** CD spectra of the ligands **3a** (a), **3c** (c), **3e** (e), and **3g** (g), in the presence of ct DNA in BPE buffer (pH = 7.00, 5% DMSO) at  $LDR$  0.00 (black), 0.05 (red), 0.20 (blue), 0.50 (magenta), and 1.00 (green);  $c_{\text{DNA}} = 20 \mu\text{M}$ ;  $T = 20 \text{ }^\circ\text{C}$ . The arrows indicate the development of the CD bands with increasing  $LDR$ .

**Table S3.** Composition of samples for *flow*-LD-spectroscopic measurements.

| Sample <sup>a</sup> | $c_{\text{Ligand}}/\mu\text{M}$ | $V_{\text{Ligand}}/\mu\text{L}^b$ | <i>LDR</i> |
|---------------------|---------------------------------|-----------------------------------|------------|
| 1                   | 0                               | 0                                 | 0          |
| 2                   | 1.0                             | 1.0                               | 0.05       |
| 3                   | 4.0                             | 4.0                               | 0.20       |
| 4                   | 10                              | 10                                | 0.50       |
| 5                   | 20                              | 20                                | 1.00       |

<sup>a</sup> $c_{\text{DNA}} = 20 \mu\text{M}$ ;  $V_{\text{DNA}} = 100 \mu\text{L}$ ;  $V(\text{buffer}) = 850 \mu\text{L}$   $V(\text{DMSO}) = 50 \mu\text{L}$ ; <sup>b</sup> $c_0(\text{Ligand}) = 1.00 \text{ mM}$  in MeOH, Solvent was removed prior to the addition of DMSO, DNA and buffer.

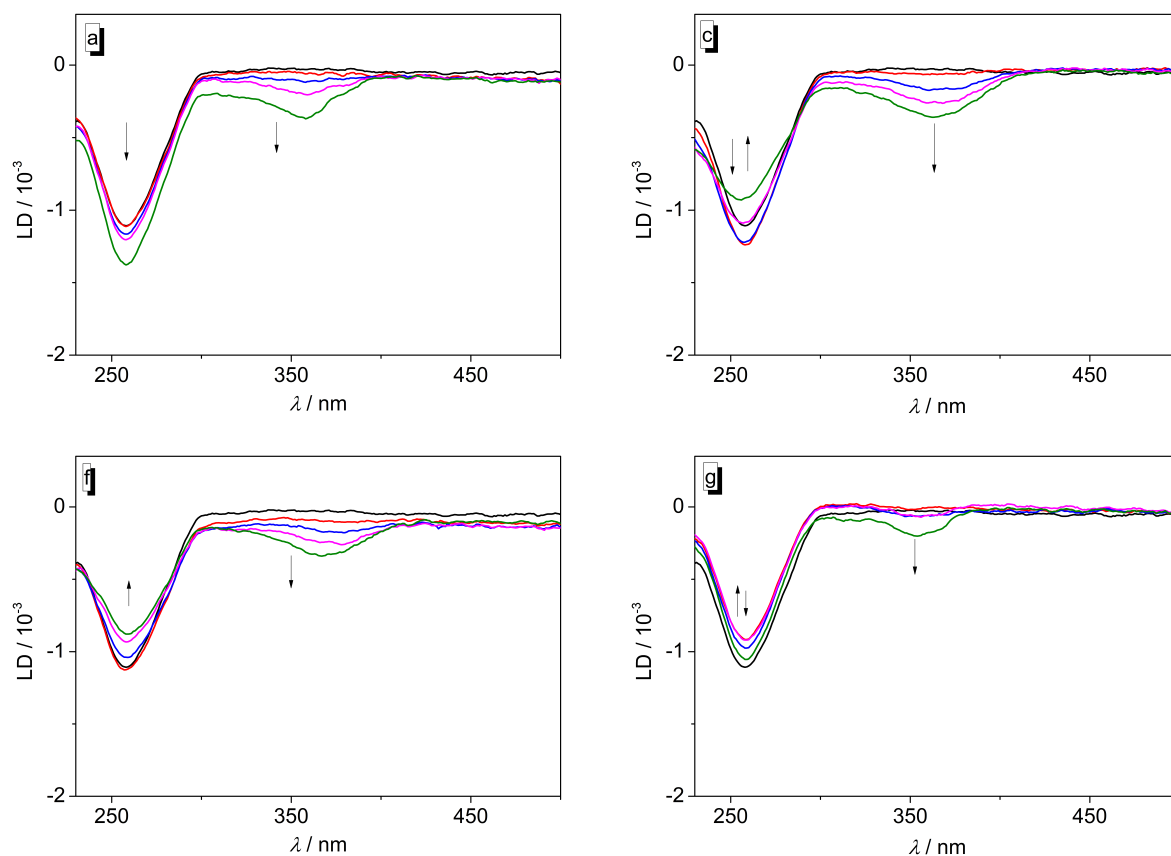

**Figure S5.** LD spectra of the ligands **3a** (a), **3c** (c), **3f** (f), and **3g** (g), in the presence of ct DNA in BPE buffer (pH = 7.00, 5% DMSO) at *LDR* 0.00 (black), 0.05 (red), 0.20 (blue), 0.50 (magenta), and 1.00 (green);  $c_{\text{DNA}} = 20 \mu\text{M}$ ;  $T = 20 \text{ }^\circ\text{C}$ . The arrows indicate the development of the CD bands with increasing *LDR*.



## 2.3. $^1\text{H}$ - and $^{13}\text{C}$ -NMR spectra

PROTON\_01.esp

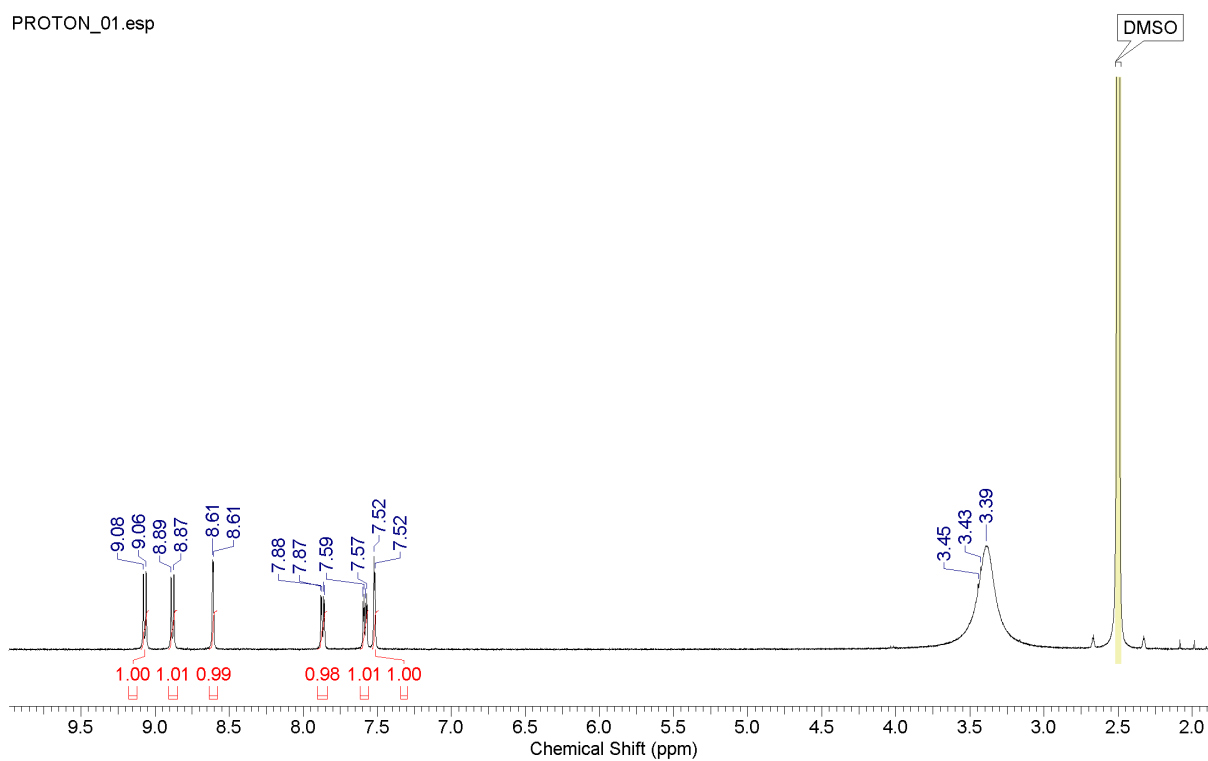

**Figure S6.**  $^1\text{H}$ -NMR spectrum of compound **7** in  $\text{DMSO-}d_6$  (600 MHz).

CARBON\_01.esp

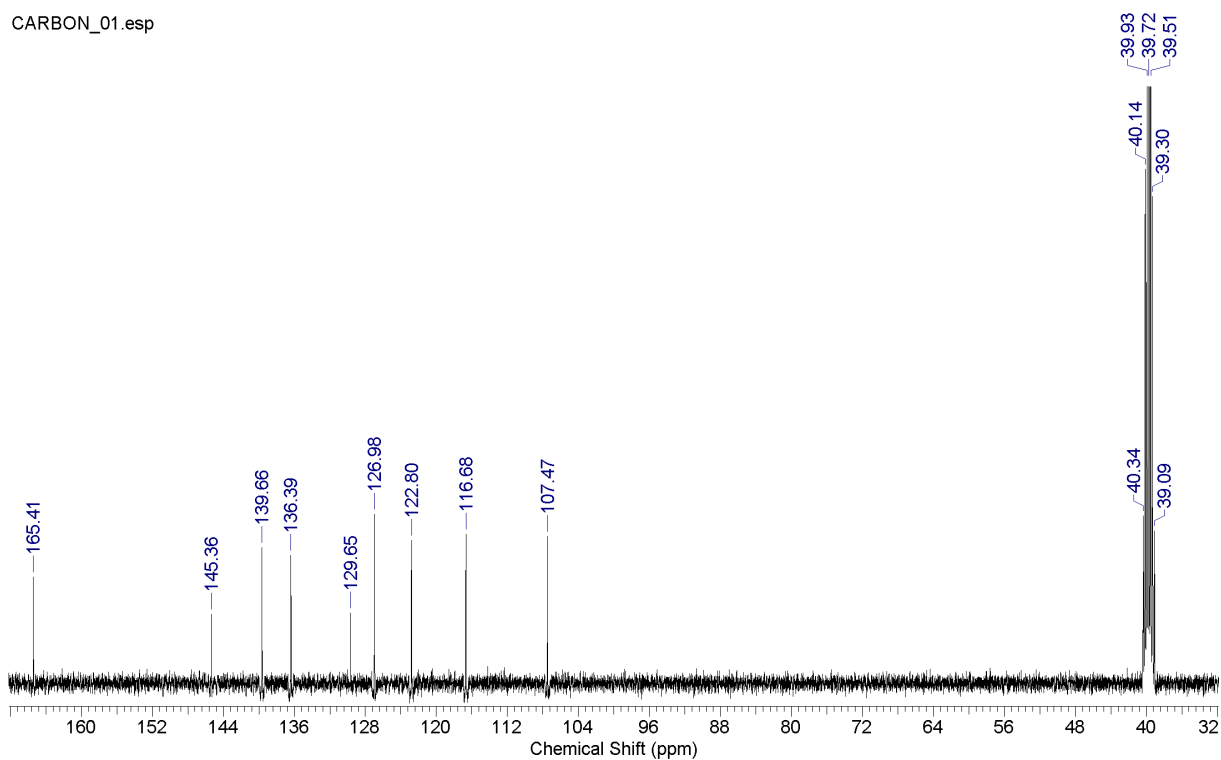

**Figure S7.**  $^{13}\text{C}$ -NMR spectrum of compound **7** in  $\text{DMSO-}d_6$  (150 MHz).

PROTON\_01.esp

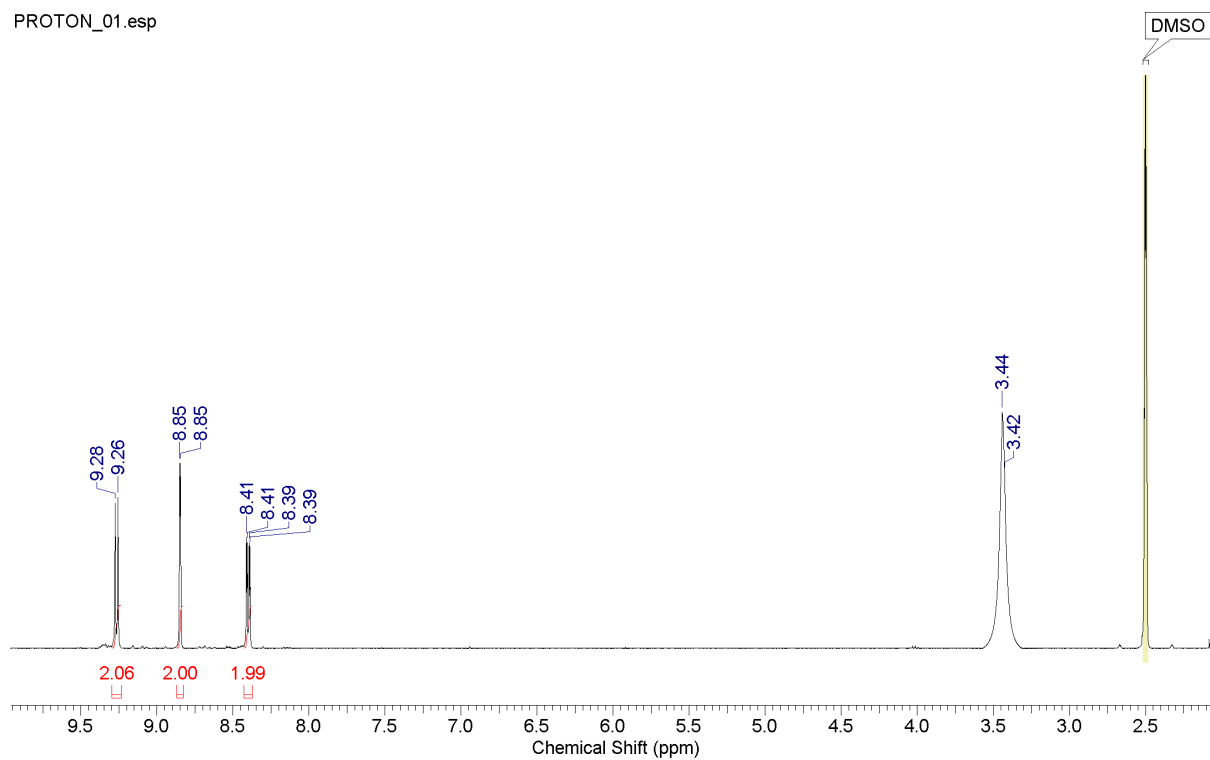

**Figure S8.**  $^1\text{H}$ -NMR spectrum of compound **1b** in  $\text{DMSO-}d_6$  (600 MHz).

CARBON\_01.esp

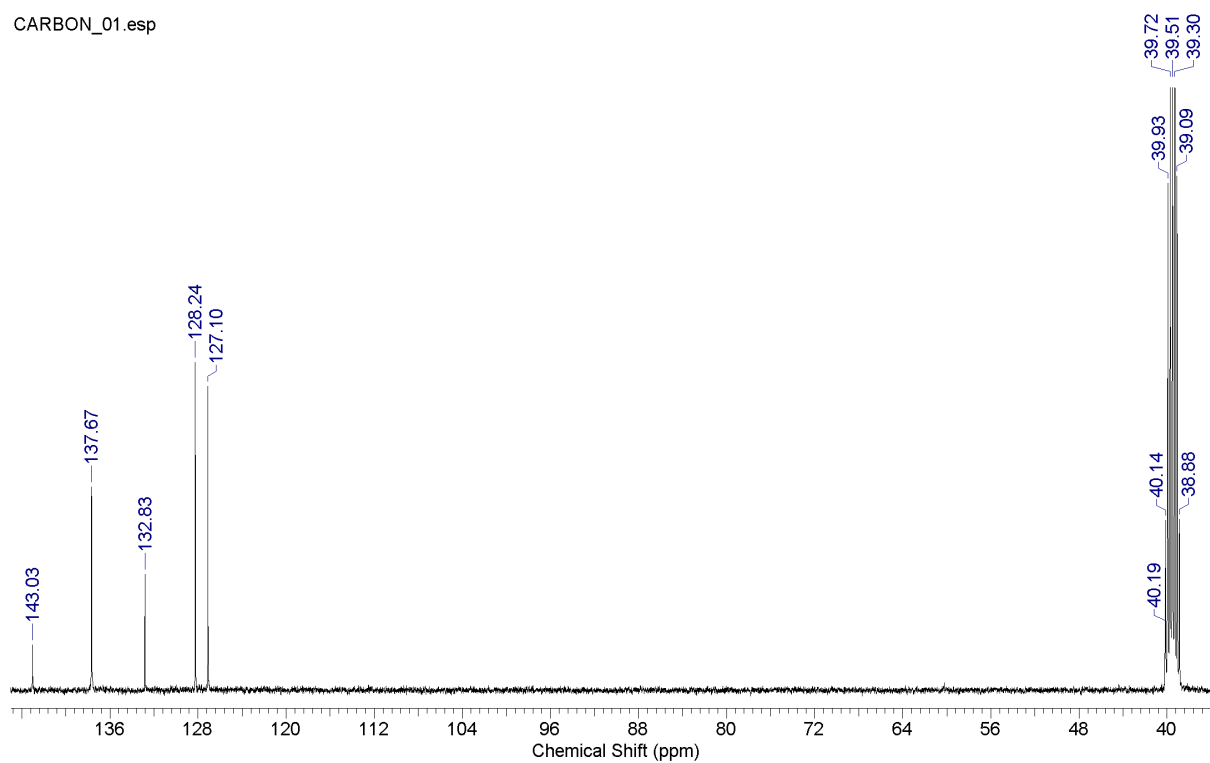

**Figure S9.**  $^{13}\text{C}$ -NMR spectrum of compound **1b** in  $\text{DMSO-}d_6$  (150 MHz).

PROTON\_01.esp

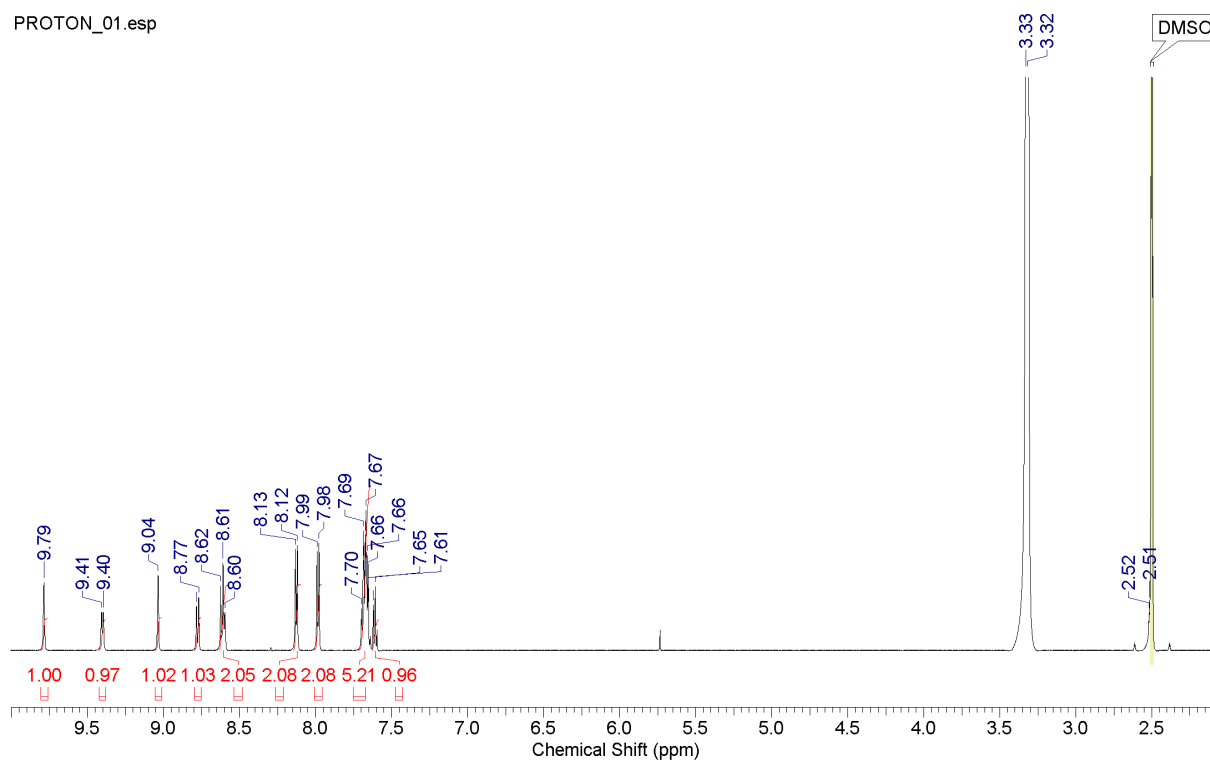

**Figure S10.**  $^1\text{H}$ -NMR spectrum of compound **3a** in  $\text{DMSO-}d_6$  (600 MHz).

CARBON\_01.esp

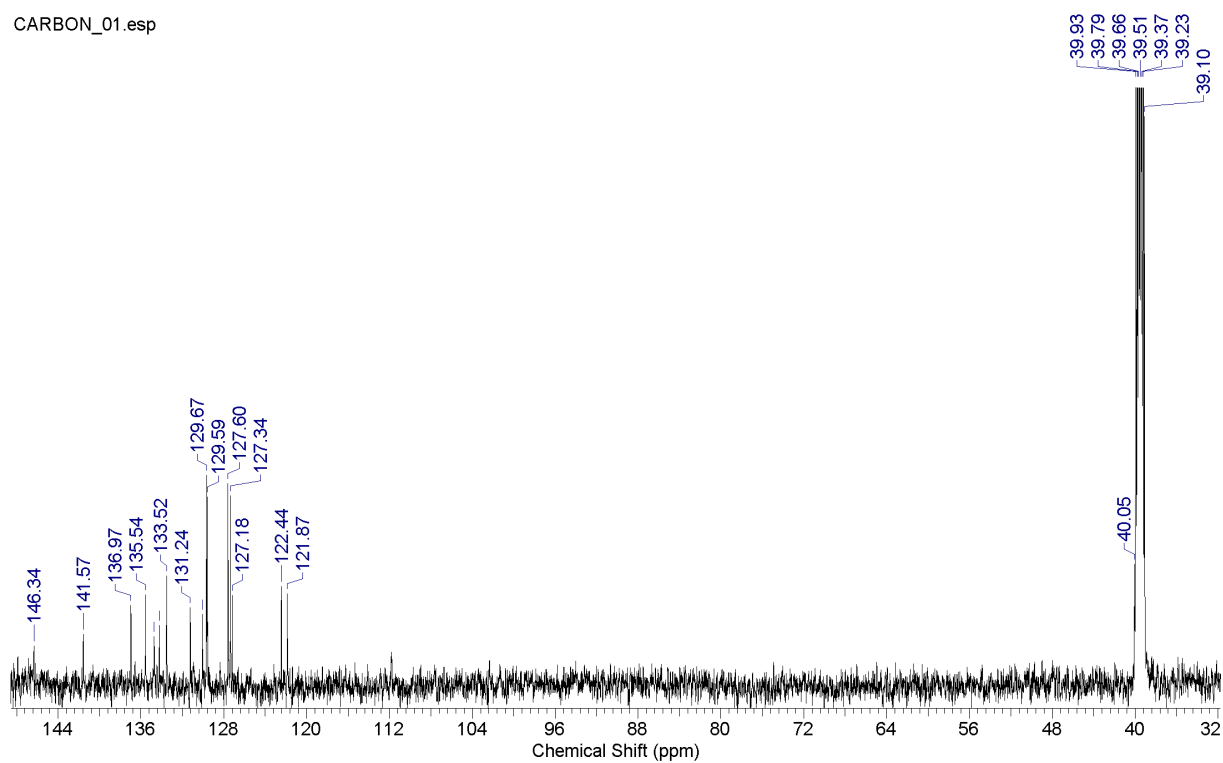

**Figure S11.**  $^{13}\text{C}$ -NMR spectrum of compound **3a** in  $\text{DMSO-}d_6$  (150 MHz).

PROTON\_01.esp

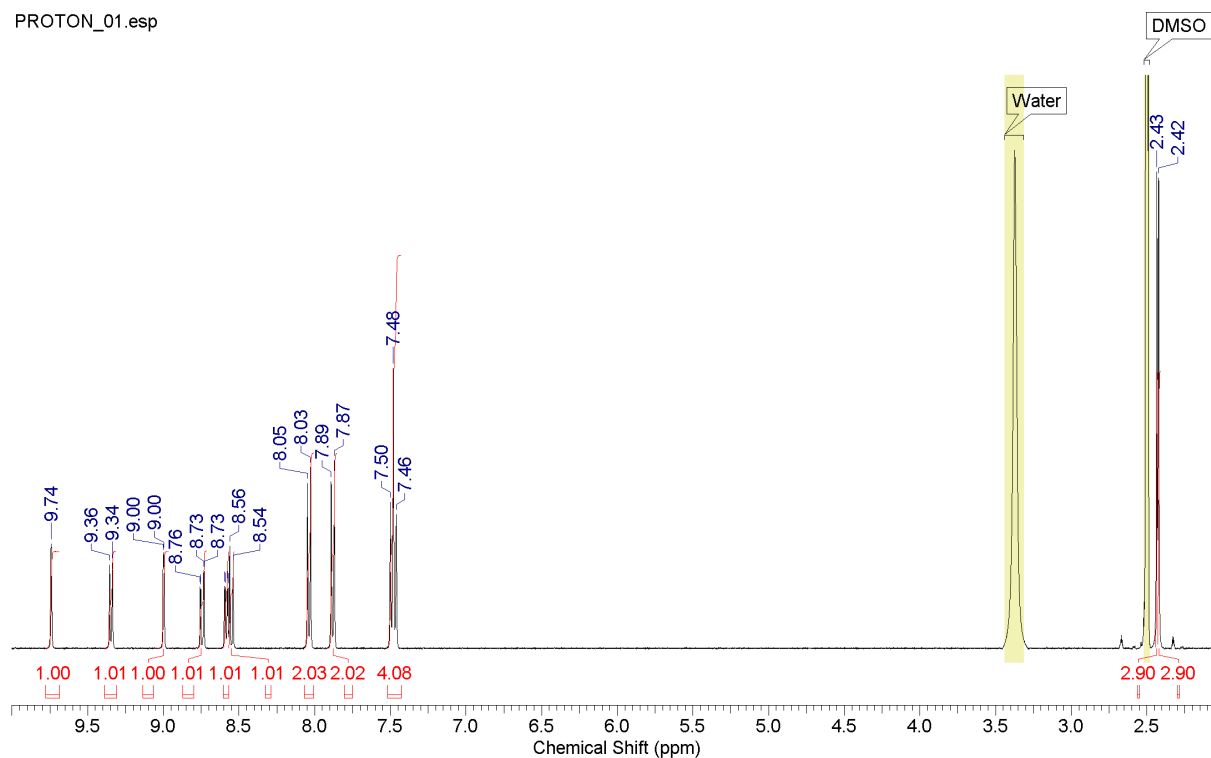

Figure S12. <sup>1</sup>H-NMR spectrum of compound **3b** in DMSO-*d*<sub>6</sub> (600 MHz).

CARBON\_01.esp

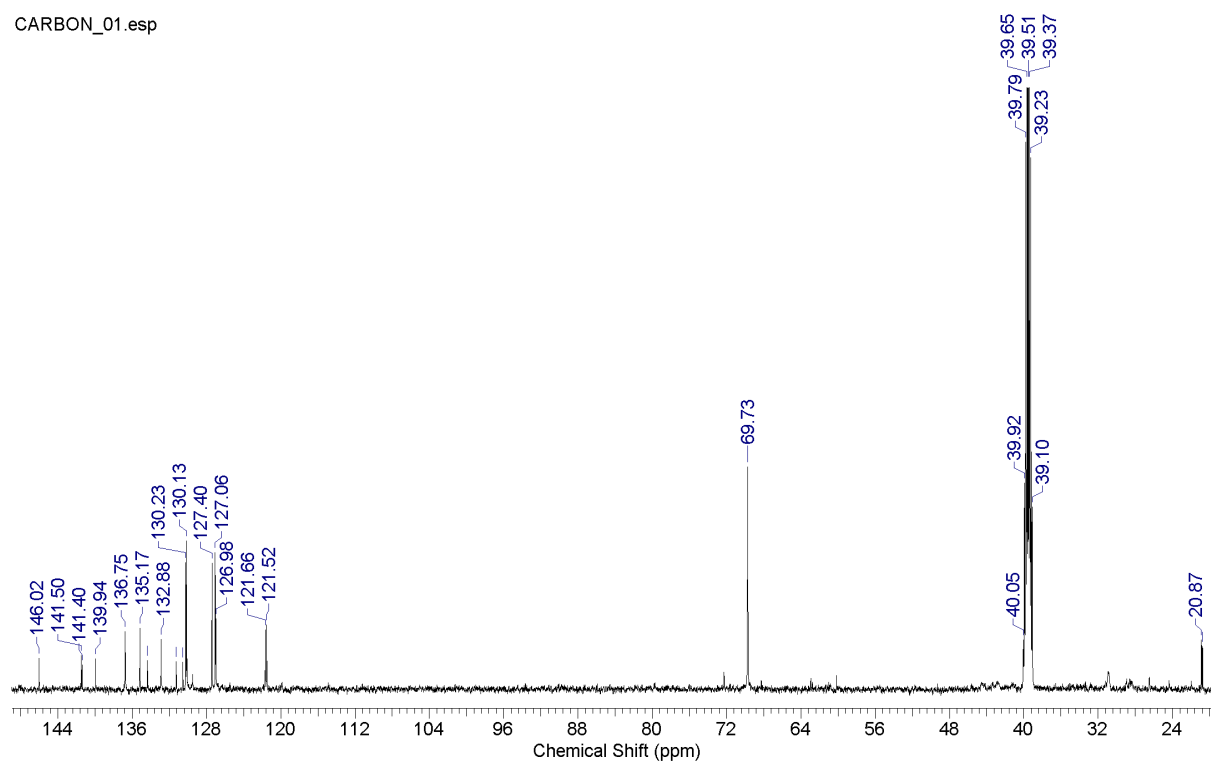

Figure S13. <sup>13</sup>C-NMR spectrum of compound **3b** in DMSO-*d*<sub>6</sub> (150 MHz).

PROTON\_01.esp

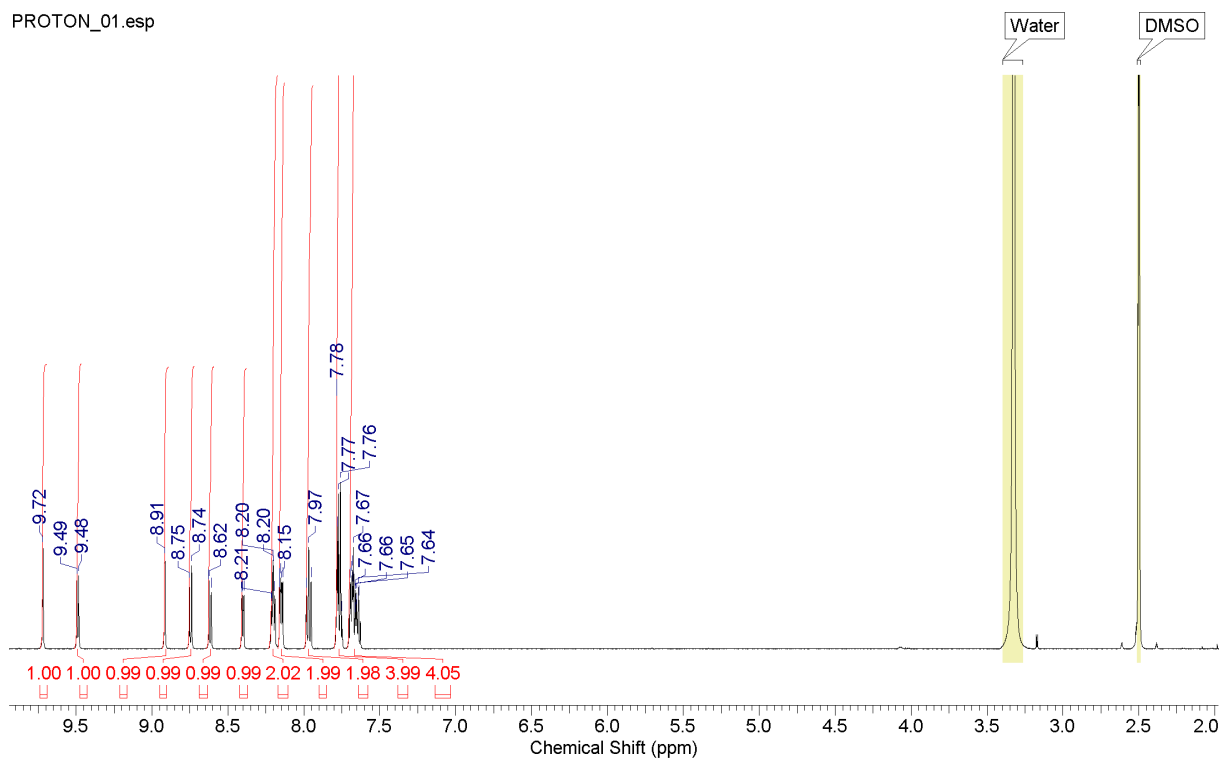

Figure S14.  $^1\text{H-NMR}$  spectrum of compound **3c** in  $\text{DMSO-}d_6$  (600 MHz).

CARBON\_01.esp

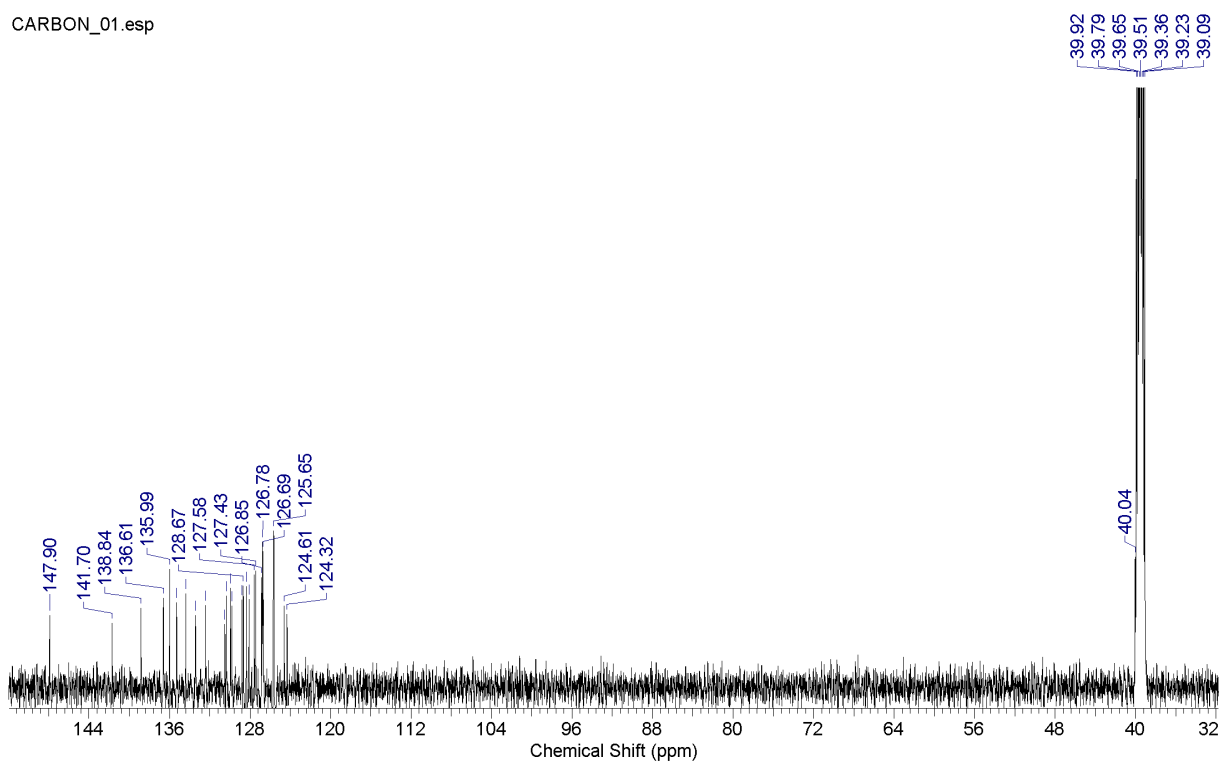

Figure S15.  $^{13}\text{C-NMR}$  spectrum of compound **3c** in  $\text{DMSO-}d_6$  (150 MHz).

1H.esp

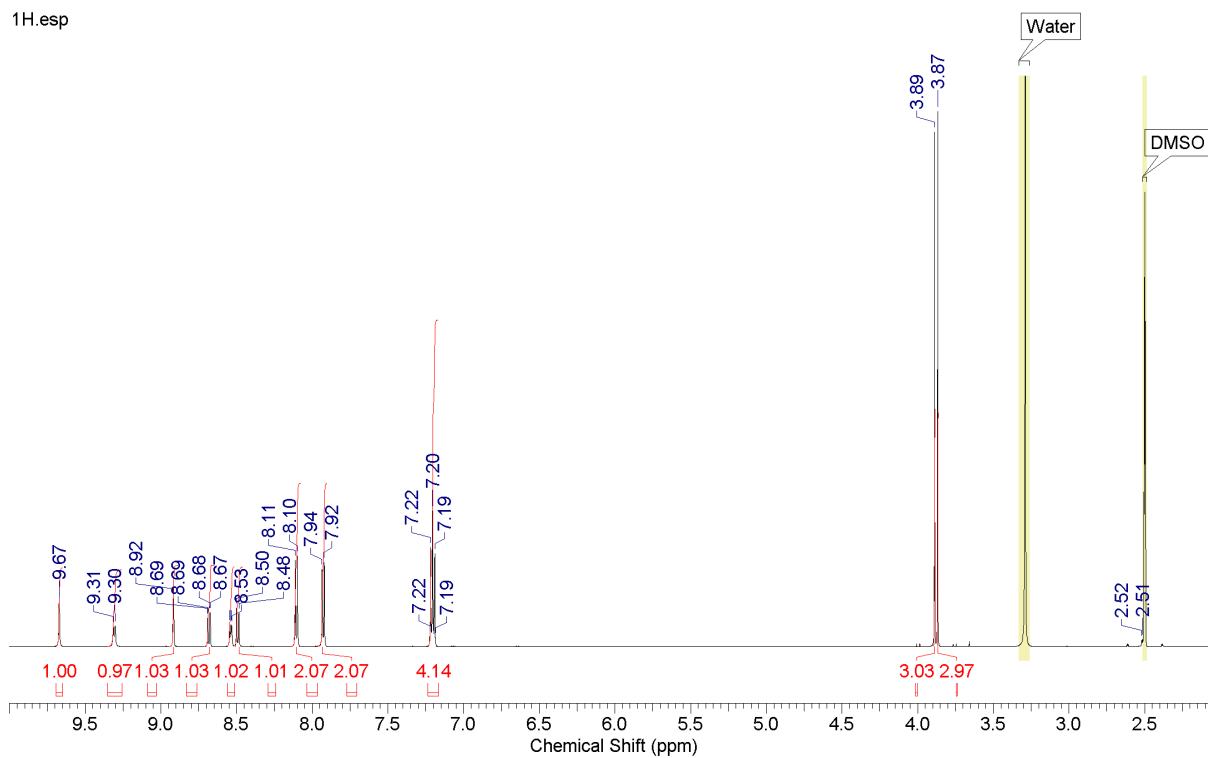

**Figure S16.**  $^1\text{H}$ -NMR spectrum of compound **3d** in  $\text{DMSO-}d_6$  (600 MHz).

CARBON\_01.esp

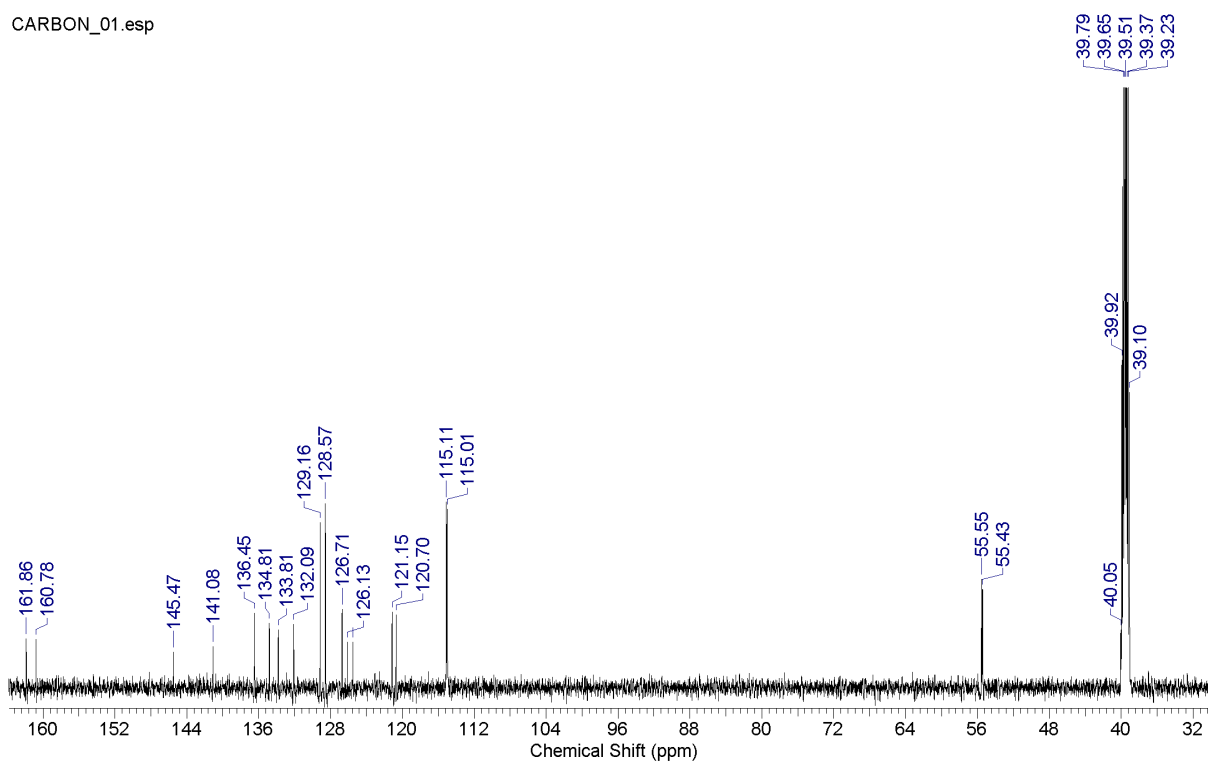

**Figure S17.**  $^{13}\text{C}$ -NMR spectrum of compound **3d** in  $\text{DMSO-}d_6$  (150 MHz).

PROTON\_01.esp

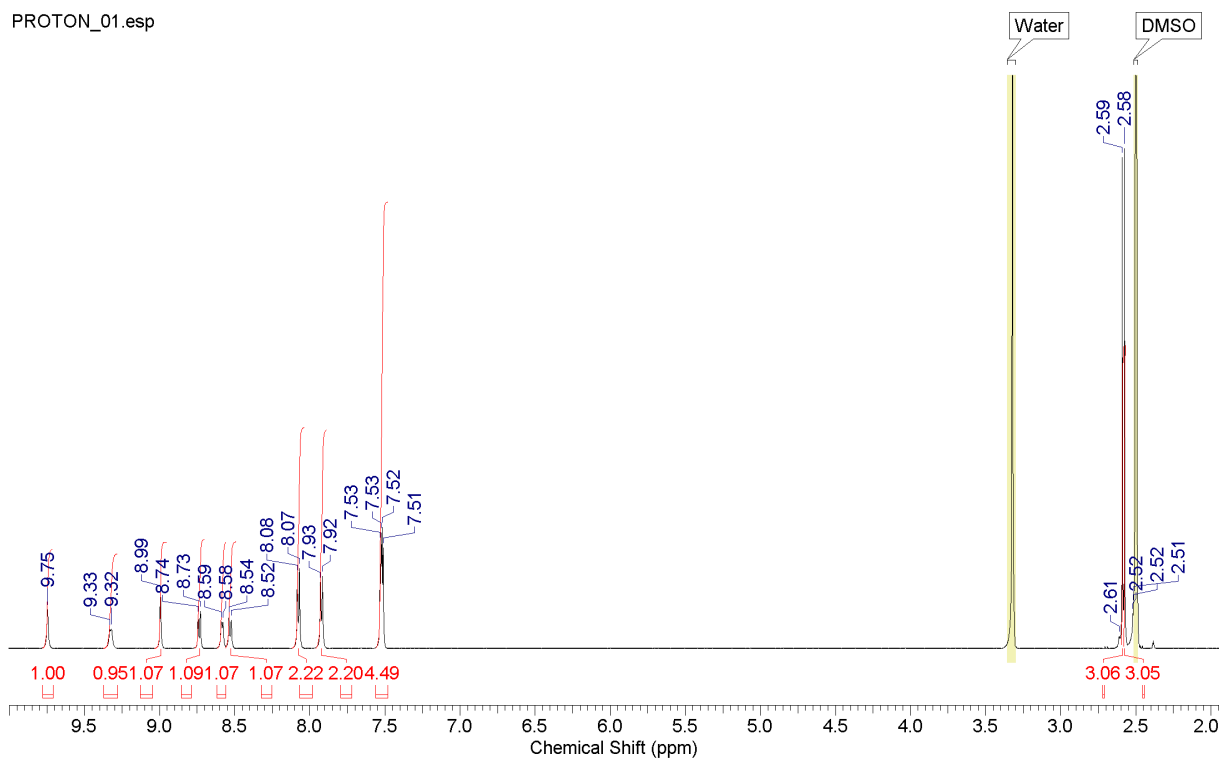

Figure S18.  $^1\text{H-NMR}$  spectrum of compound **3e** in  $\text{DMSO-}d_6$  (600 MHz).

CARBON\_01.esp

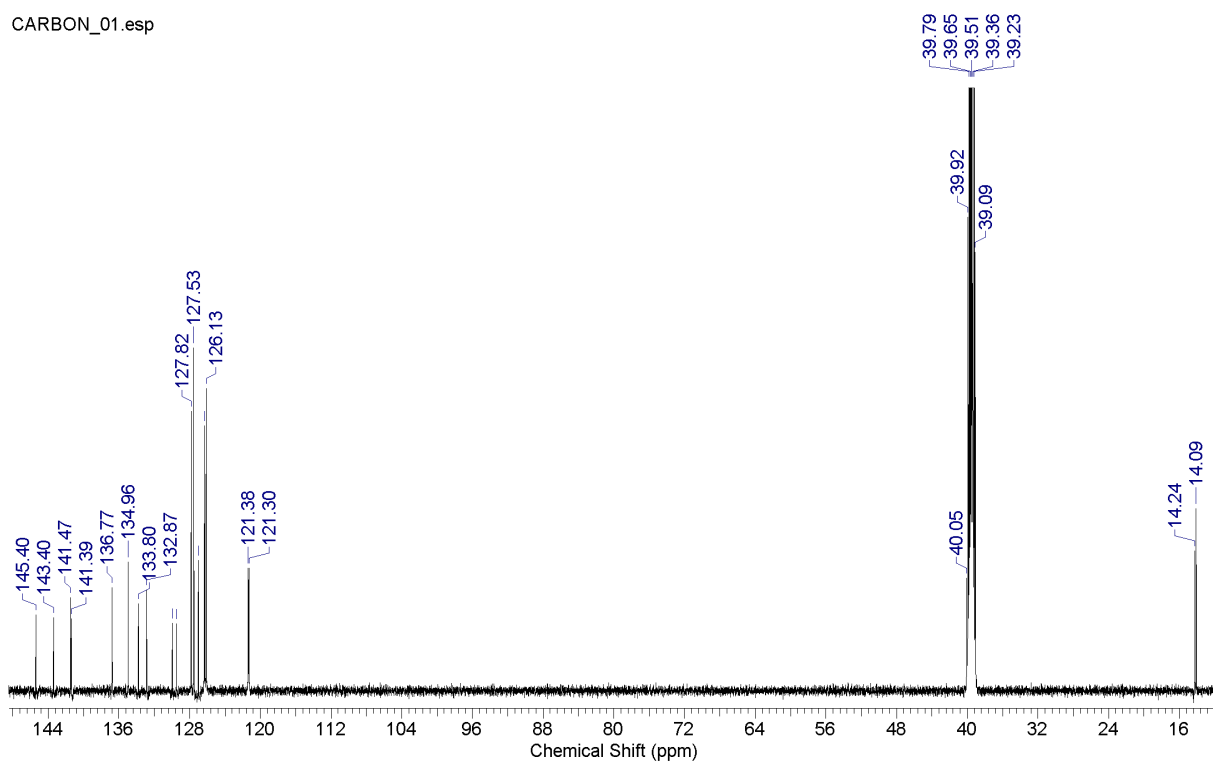

Figure S19.  $^{13}\text{C-NMR}$  spectrum of compound **3e** in  $\text{DMSO-}d_6$  (150 MHz).

PROTON\_01.esp

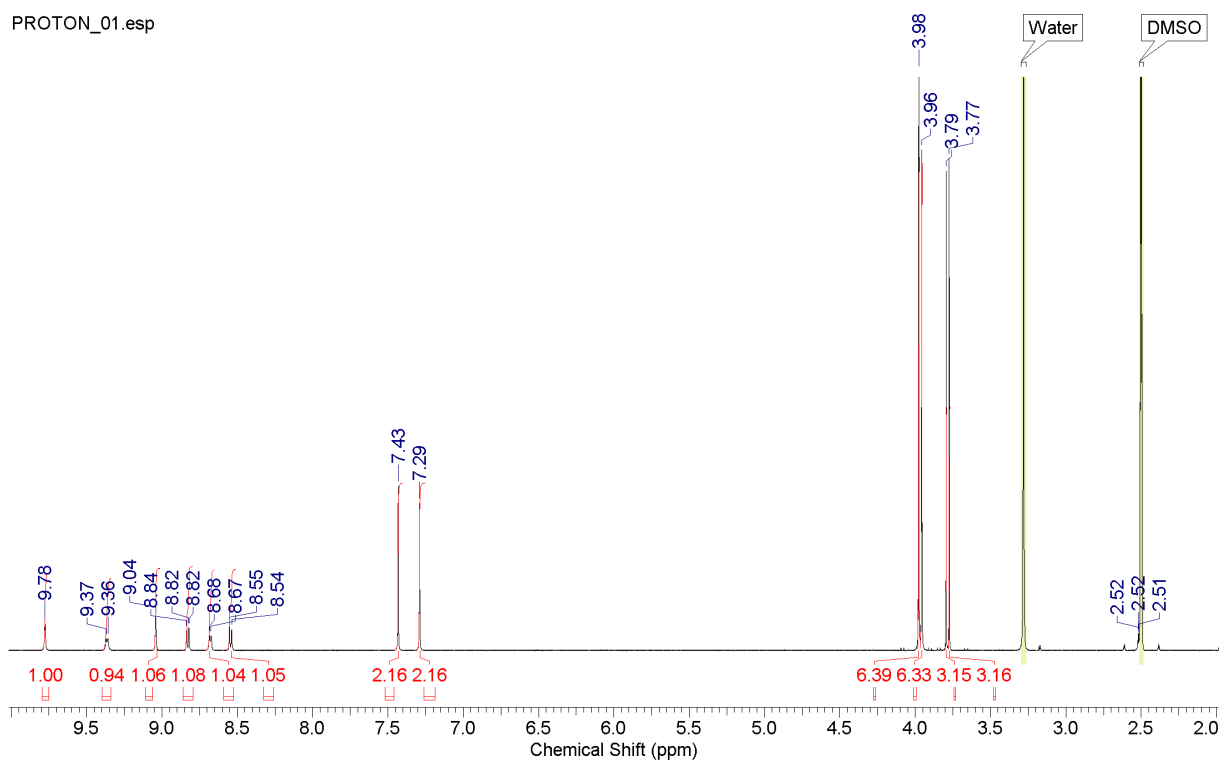

Figure S20.  $^1\text{H-NMR}$  spectrum of compound **3f** in  $\text{DMSO-}d_6$  (600 MHz).

CARBON\_01.esp

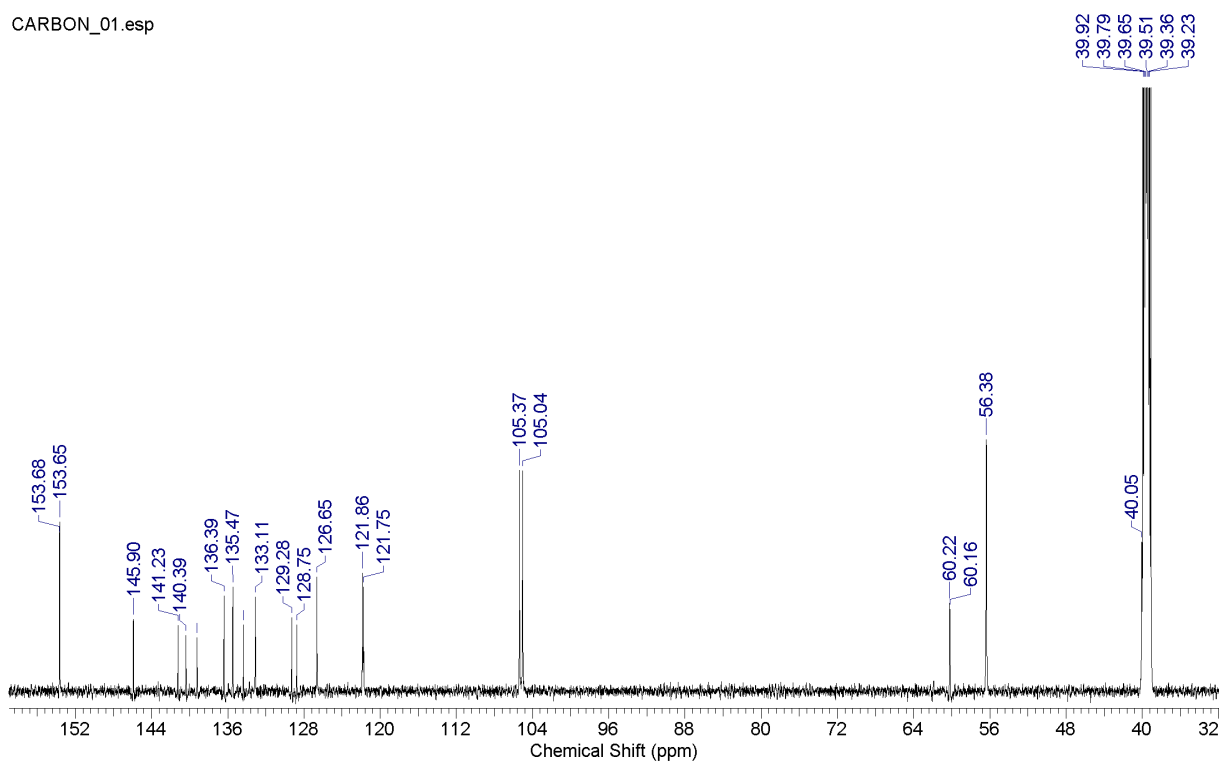

Figure S21.  $^{13}\text{C-NMR}$  spectrum of compound **3f** in  $\text{DMSO-}d_6$  (150 MHz).



PROTON\_01.esp

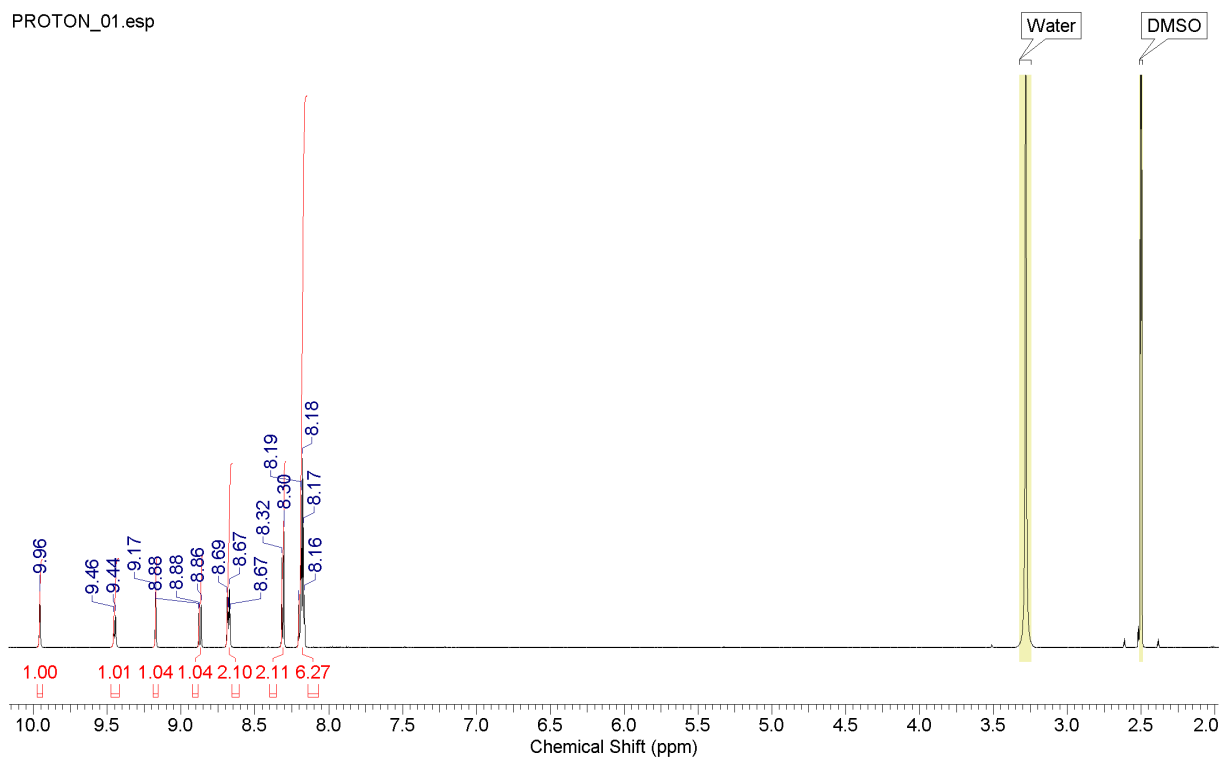

Figure S22.  $^1\text{H}$ -NMR spectrum of compound **3g** in  $\text{DMSO-}d_6$  (600 MHz).

CARBON\_01.esp

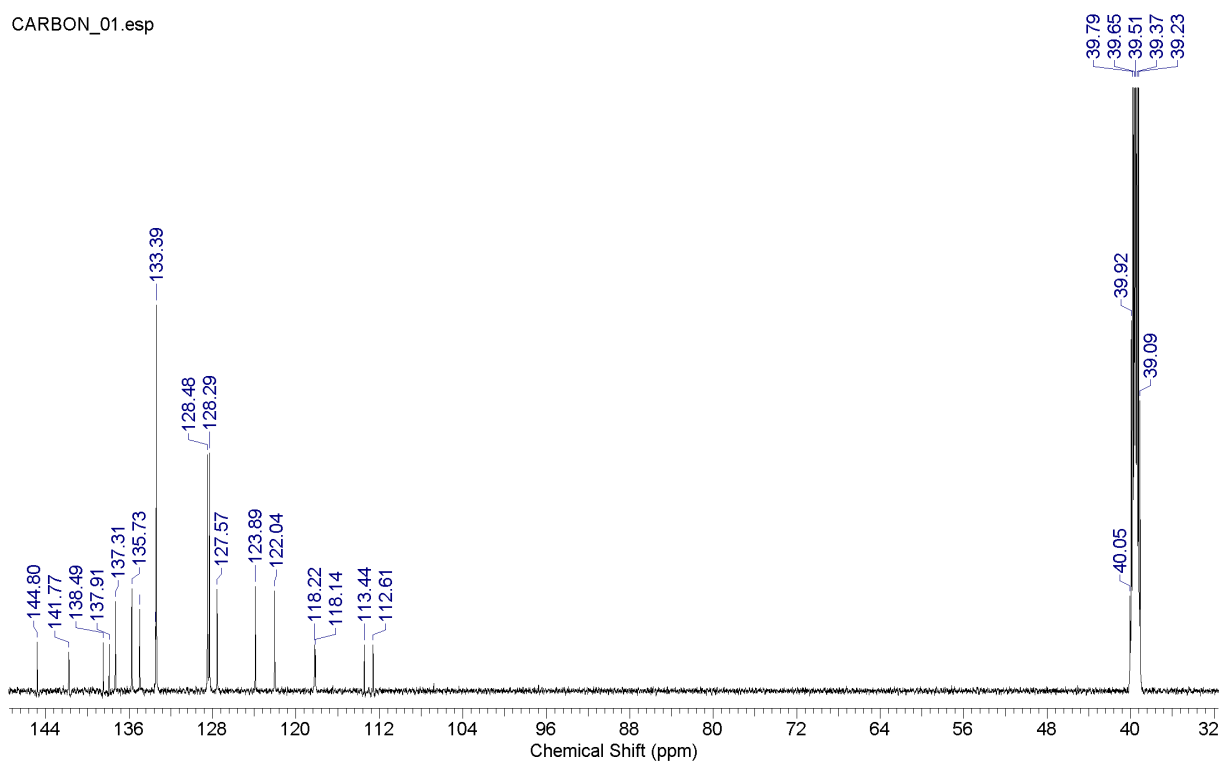

Figure S23.  $^{13}\text{C}$ -NMR spectrum of compound **3g** in  $\text{DMSO-}d_6$  (150 MHz).

PROTON\_01.esp

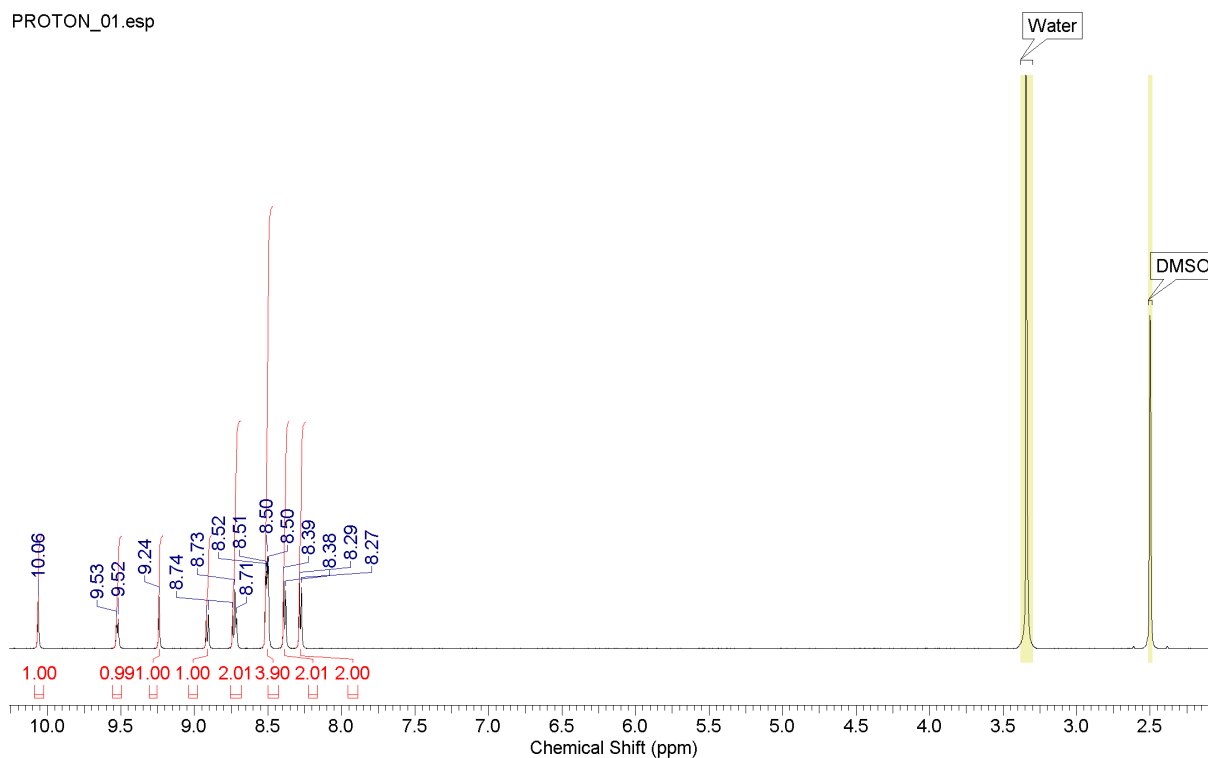

**Figure S24.**  $^1\text{H-NMR}$  spectrum of compound **3h** in  $\text{DMSO-}d_6$  (600 MHz).

CARBON\_01.esp

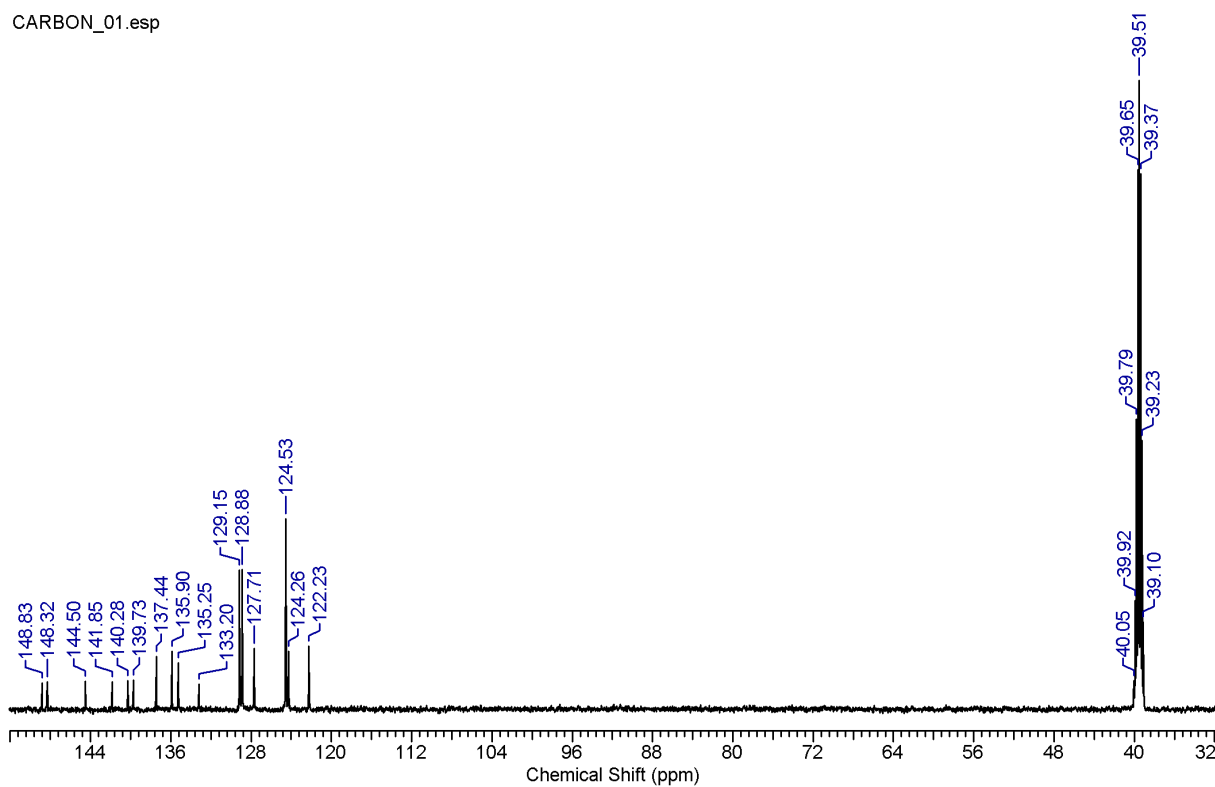

**Figure S25.**  $^{13}\text{C-NMR}$  spectrum of compound **3h** in  $\text{DMSO-}d_6$  (150 MHz).

PROTON\_01.esp

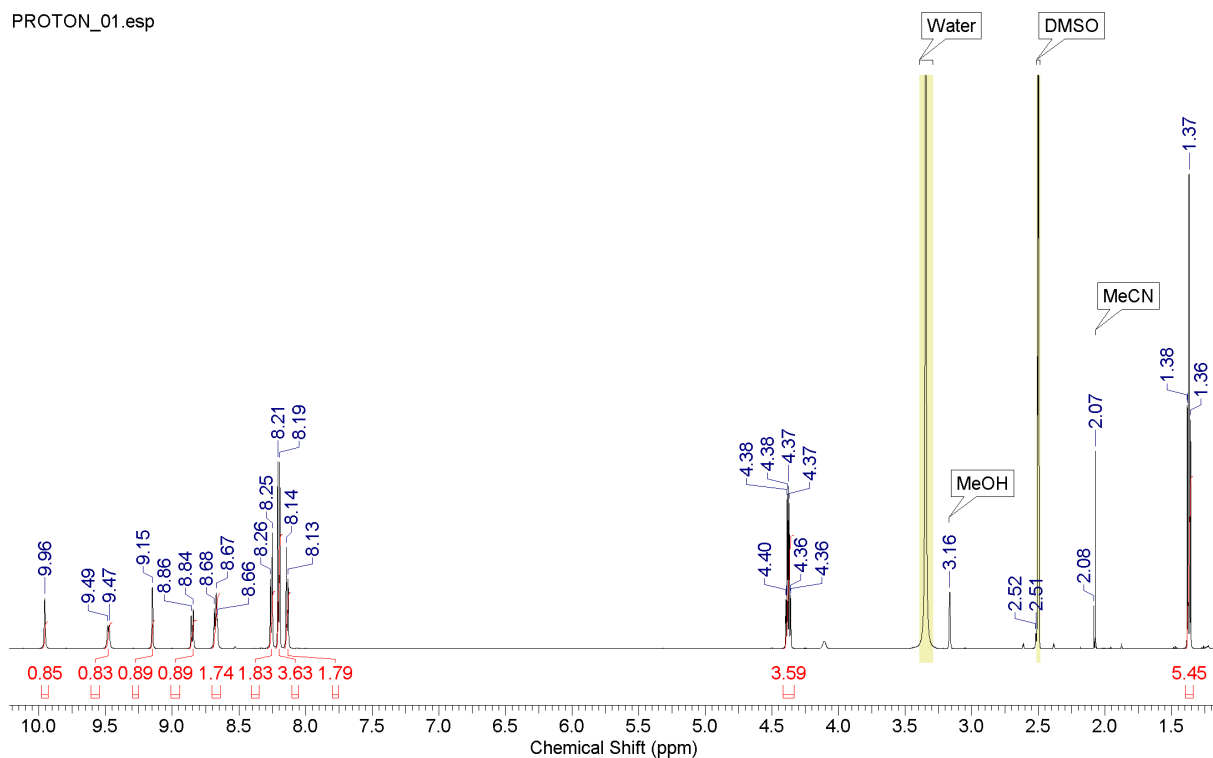

**Figure S26.** <sup>1</sup>H-NMR spectrum of compound **3i** in DMSO-*d*<sub>6</sub> (600 MHz).

CARBON\_01.esp

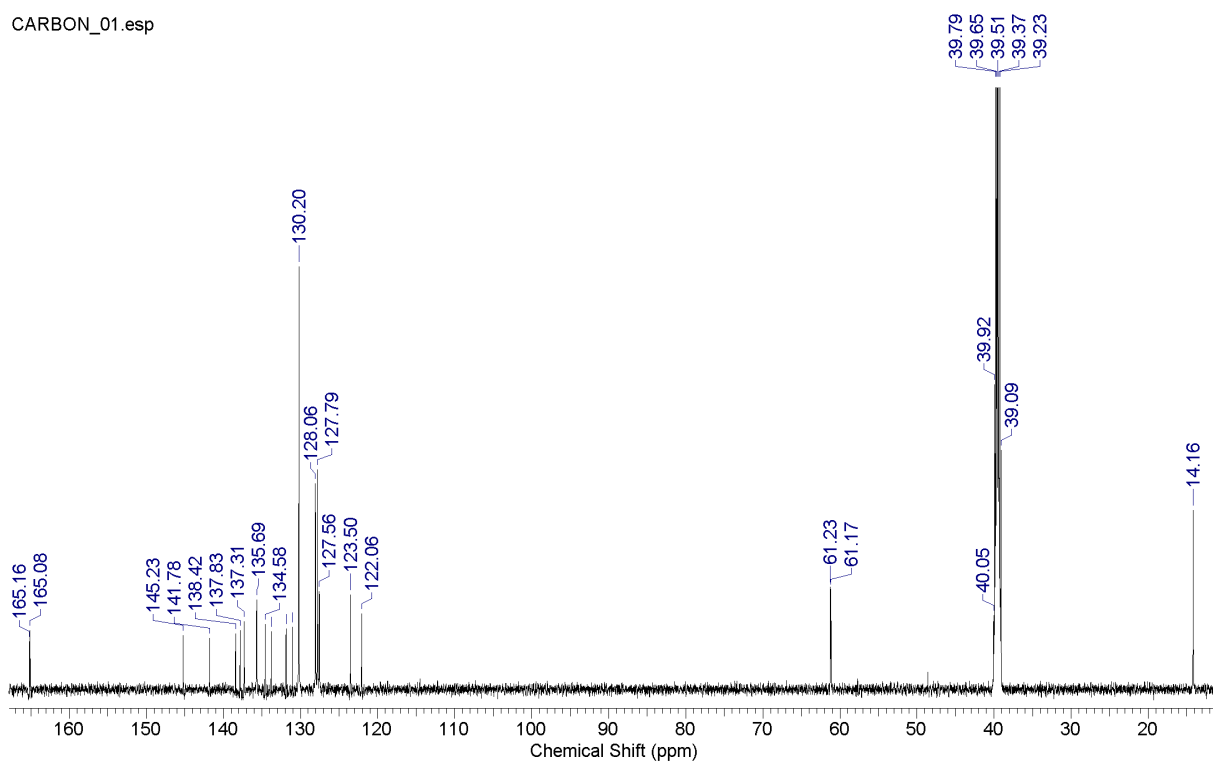

**Figure S27.** <sup>13</sup>C-NMR spectrum of compound **3i** in DMSO-*d*<sub>6</sub> (150 MHz).

PROTON\_01.esp

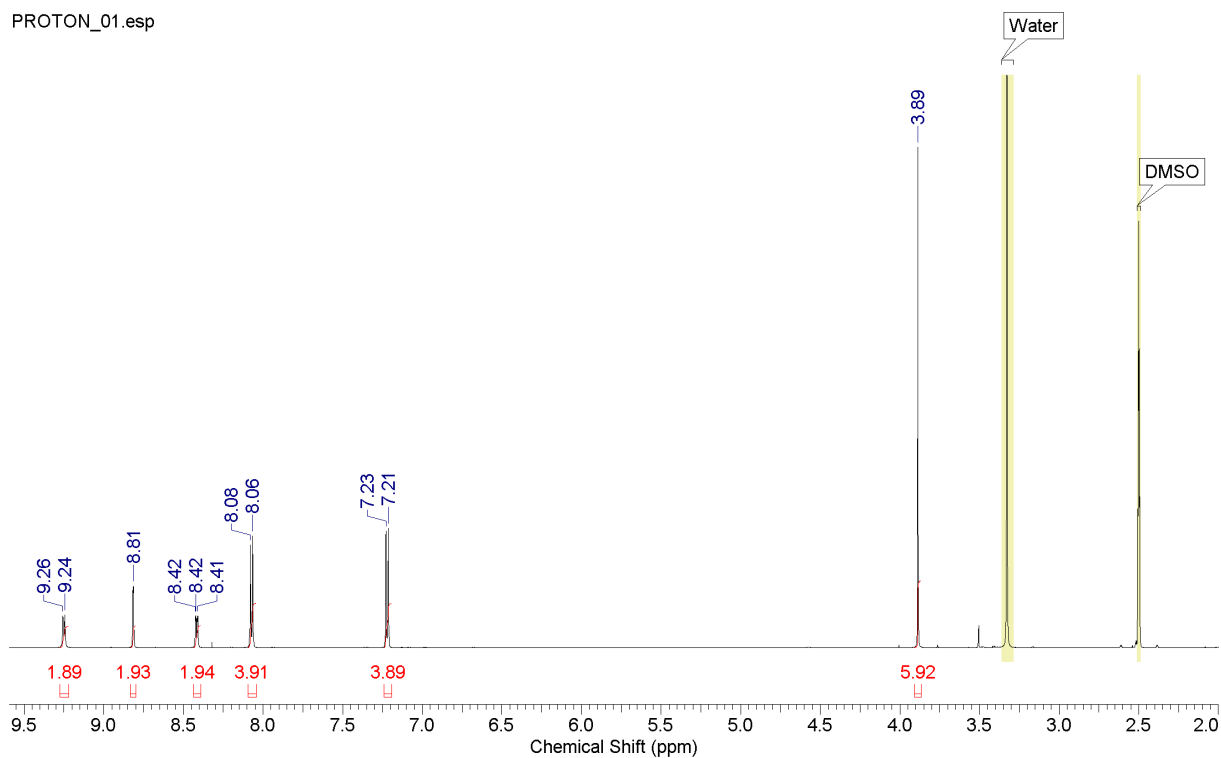

**Figure S28.**  $^1\text{H}$ -NMR spectrum of compound **3j** in  $\text{DMSO}-d_6$  (600 MHz).

CARBON\_01.esp

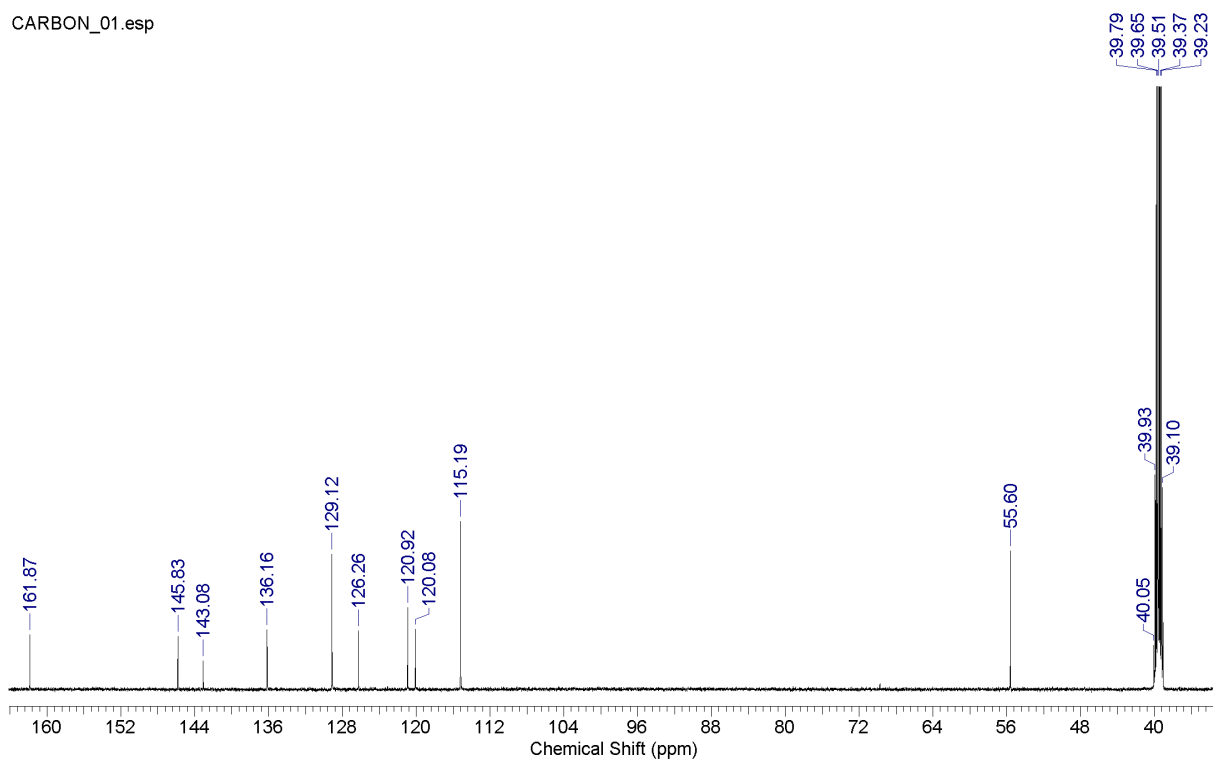

**Figure S29.**  $^{13}\text{C}$ -NMR spectrum of compound **3j** in  $\text{DMSO}-d_6$  (150 MHz).
